# Supplementary material
Source: publisher figshare collection journal article supplement (https://rs.figshare.com/ndownloader/files/13311791)
Supplement: Supplementary file 1 [file 13311791]

**Supplementary Material 2: Social eavesdropping allows for a more risky gliding strategy by thermal-soaring birds**

Hannah J. Williams*1, Andrew J. King1, Olivier Duriez2, Luca Börger1, Emily L.C. Shepard*1

**
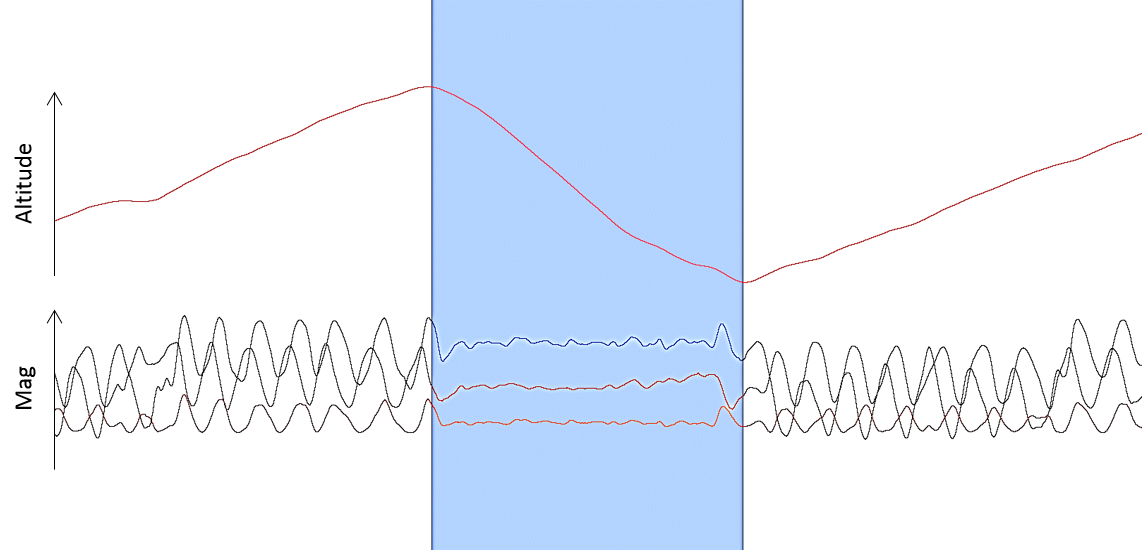
**

**Figure SM2: Identifying inter-thermal glides.** Glides wereclearly identifiable as periods of straight flight and sustained altitude loss between bouts of circling behaviour (see Williams et al. 2015 for details). The circling is represented by a consistent sine-wave when the tri-axial magnetometry data is plotted against time. This indicates turning within the thermal updraft.

**References**

Williams, H.J., Shepard, E.L.C., Duriez, O. and Lambertucci, S. (2015). Can accelerometry be used to distinguish between flight types in soaring birds? Anim Biotelemetry. 3(45).
